# Supplementary material for: Bioactive Compounds and Antioxidant Capacity of Small Berries
Source: PubMed Central journal article supplement (PMC7278679; doi:10.3390/foods9050623), 2020-05-13
Supplement: foods-09-00623-s001.pdf [file foods-09-00623-s001.pdf]

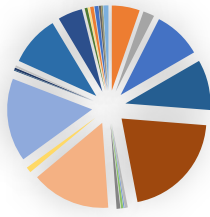

### Blackberries

- Ferulic acid hexoside 1
- Catechin dimer
- Quercetin
- Cyanidin-hexoside (Chrysanthemine)
- Chlorogenic acid 2
- Ferulic acid hexoside 2
- Cyanidin-rhamnetin-dihexoside
- Quercetin-arabinoside
- Naringenin-hexoside
- Petunidin-pentoside
- Kaempferol-glucuronide 2
- Rhamnetil-malonyl-hexoside
- Delphinidin-hexoside 2
- Delphinidin-pentoside
- Quercetin-glucuronide
- Quercetin-xylosil-rhamnosil-hexoside
- Malvidin-hexoside 2
- Myricetin-hexoside
- Cynarine 2
- Quercetin acetyl-hexoside 2
- Kaempferol-rhamnetil-hexoside
- Quercetin-malonyl-hexoside
- Catechin dimer
- Chlorogenic acid 1
- Cyanidin-sambubiosil-rhamnetil 2
- Caffeoyl-hexose 1
- Kaempferol-rhamnoside
- Quercetin-galloyl-hexoside
- Kaempferol-dihexoside
- Coumaric acid hexoside 2
- Caffeoyl-hexose 2
- Catechin
- Coumaric acid hexoside 1
- Kaempferol-dirhamnetil-hexoside
- Malvidin-acetylhexoside
- Delphinidin-rhamnetin-hexoside
- Kaempferol-malonyl-hexoside
- Cyanidin-hexosil-pentoside
- Kaempferol-hexoside
- Malvidin-hexoside 1
- Quercetin-hexoside
- Epicatechin
- Petunidin-hexoside 1
- Petunidin-hexoside 2
- Myricetin-dihexosil-rhamnoside
- Quercetin acetyl-hexoside 1
- Cynarine 3
- Delphinidin-hexoside 1
- Malvidin-arabinoside
- Rhamnetil-glucuronide
- Pelargonidin-sambubioside
- Cyanidin-pentoside
- Kaempferol-rhamnosil-dihexoside
- Ellagic acid acetyl-xyloside
- Quercetin-rhamnetil-hexoside
- Quercetin-dihexoside

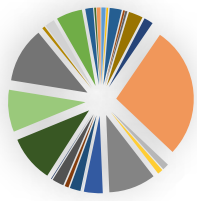

### Black currants

- Caffeoyl-hexose 1
- Catechin
- Catechin dimer
- Chlorogenic acid 2
- Coumaric acid hexoside 2
- Cyanidin-hexosil-pentoside
- Cyanidin-rhamnetin-dihexoside
- Cyanidin-sambubiosil-rhamnetil 2
- Cynarine 1
- Cynarine 3
- Delphinidin-hexoside 2
- Delphinidin-rhamnetin-hexoside
- Epicatechin
- Ferulic acid hexoside 2
- Kaempferol-glucuronide 1
- Kaempferol-hexoside
- Kaempferol-rhamnetil-hexoside
- Kaempferol
- Kaempferol-rhamnoside
- Malvidin-arabinoside
- Malvidin-hexoside 2
- Myricetin-dihexosil-rhamnoside
- Myricetin-hexosil-rhamnoside
- Pelargonidin-sambubioside
- Caffeoyl-hexose 2
- Catechin dimer
- Chlorogenic acid 1
- Coumaric acid hexoside 1
- Cyanidin-hexoside (Chrysanthemine)
- Cyanidin-pentoside
- Cyanidin-rutinoside
- Cyanidin-sambubiosil-rhamnetil 1
- Cynarine 2
- Delphinidin-hexoside 1
- Delphinidin-pentoside
- Ellagic acid acetyl-xyloside
- Ferulic acid hexoside 1
- Kaempferol-dirhamnetil-hexoside
- Kaempferol-glucuronide 2
- Kaempferol-malonyl-hexoside
- Kaempferol-rhamnosil-dihexoside
- Kaempferol-dihexoside
- Malvidin-acetylhexoside
- Malvidin-hexoside 1
- Myricetin-hexoside
- Myricetin-hexosil-dirhamnoside
- Naringenin-hexoside
- Petunidin-hexoside 1

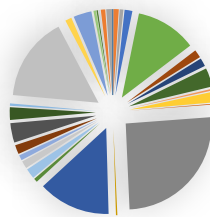

### Blueberries Cv. Blue Ray

- Ferulic acid hexoside 1
- Catechin dimer
- Quercetin
- Cyanidin-hexoside (Chrysanthemine)
- Chlorogenic acid 2
- Ferulic acid hexoside 2
- Cyanidin-rhamnetin-dihexoside
- Quercetin-arabinoside
- Naringenin-hexoside
- Petunidin-pentoside
- Kaempferol-glucuronide 2
- Rhamnetil-malonyl-hexoside
- Delphinidin-hexoside 2
- Delphinidin-pentoside
- Quercetin-glucuronide
- Quercetin-xylosil-rhamnosil-hexoside
- Malvidin-hexoside 2
- Myricetin-hexoside
- Cynarine 2
- Quercetin acetyl-hexoside 2
- Kaempferol-rhamnetil-hexoside
- Quercetin-malonyl-hexoside
- Catechin dimer
- Chlorogenic acid 1
- Cyanidin-sambubiosil-rhamnetil 2
- Caffeoyl-hexose 1
- Kaempferol-rhamnoside
- Quercetin-galloyl-hexoside
- Kaempferol-dihexoside
- Coumaric acid hexoside 2
- Caffeoyl-hexose 2
- Catechin
- Coumaric acid hexoside 1
- Kaempferol-dirhamnetil-hexoside
- Malvidin-acetylhexoside
- Delphinidin-rhamnetin-hexoside
- Kaempferol-malonyl-hexoside
- Cyanidin-hexosil-pentoside
- Kaempferol-hexoside
- Malvidin-hexoside 1
- Quercetin-hexoside
- Epicatechin
- Petunidin-hexoside 1
- Petunidin-hexoside 2
- Myricetin-dihexosil-rhamnoside
- Quercetin acetyl-hexoside 1
- Cynarine 3
- Delphinidin-hexoside 1
- Malvidin-arabinoside
- Rhamnetil-glucuronide
- Pelargonidin-sambubioside
- Cyanidin-pentoside
- Kaempferol-rhamnosil-dihexoside
- Ellagic acid acetyl-xyloside
- Quercetin-rhamnetil-hexoside
- Quercetin-dihexoside

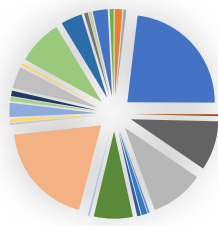

- Ferulic acid hexoside 1
- Catechin dimer
- Quercetin
- Cyanidin-hexoside (Chrysanthemine)
- Chlorogenic acid 2
- Ferulic acid hexoside 2
- Cyanidin-rhamnetin-dihexoside
- Quercetin-arabinoside
- Naringenin-hexoside
- Petunidin-pentoside
- Kaempferol-glucuronide 2
- Rhamnetil-malonyl-hexoside
- Delphinidin-hexoside 2
- Delphinidin-pentoside
- Quercetin-glucuronide
- Quercetin-xylosil-rhamnosil-hexoside
- Malvidin-hexoside 2
- Myricetin-hexoside
- Cynarine 2
- Quercetin acetyl-hexoside 2
- Kaempferol-rhamnetil-hexoside
- Quercetin-malonyl-hexoside
- Catechin dimer
- Chlorogenic acid 1
- Cyanidin-sambubiosil-rhamnetil 2
- Caffeoyl-hexose 1
- Kaempferol-dihexoside
- Coumaric acid hexoside 2
- Caffeoyl-hexose 2
- Catechin
- Coumaric acid hexoside 1
- Kaempferol-dirhamnetil-hexoside
- Malvidin-acetylhexoside
- Delphinidin-rhamnetin-hexoside
- Kaempferol-malonyl-hexoside
- Cyanidin-hexosil-pentoside
- Kaempferol-hexoside
- Malvidin-hexoside 1
- Quercetin-hexoside
- Epicatechin
- Petunidin-hexoside 1
- Petunidin-hexoside 2
- Myricetin-dihexosil-rhamnoside
- Quercetin acetyl-hexoside 1
- Cynarine 3
- Delphinidin-hexoside 1
- Malvidin-arabinoside
- Rhamnetil-glucuronide
- Pelargonidin-sambubioside
- Cyanidin-pentoside
- Kaempferol-rhamnosil-dihexoside
- Ellagic acid acetyl-xyloside

### Blueberries Cv. Duke

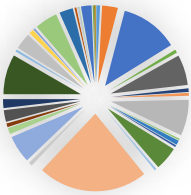

- Ferulic acid hexoside 1
- Catechin dimer
- Quercetin
- Cyanidin-hexoside (Chrysanthemine)
- Chlorogenic acid 2
- Ferulic acid hexoside 2
- Cyanidin-rhamnetin-dihexoside
- Quercetin-arabinoside
- Naringenin-hexoside
- Petunidin-pentoside
- Kaempferol-glucuronide 2
- Rhamnetil-malonyl-hexoside
- Delphinidin-hexoside 2
- Delphinidin-pentoside
- Quercetin-glucuronide
- Quercetin-xylosil-rhamnosil-hexoside
- Malvidin-hexoside 2
- Myricetin-hexoside
- Cynarine 2
- Quercetin acetyl-hexoside 2
- Kaempferol-rhamnetil-hexoside
- Quercetin-malonyl-hexoside
- Catechin dimer
- Chlorogenic acid 1
- Cyanidin-sambubiosil-rhamnetil 2
- Caffeoyl-hexose 1
- Kaempferol-rhamnoside
- Kaempferol-dihexoside
- Coumaric acid hexoside 2
- Caffeoyl-hexose 2
- Catechin
- Coumaric acid hexoside 1
- Kaempferol-dirhamnetil-hexoside
- Malvidin-acetylhexoside
- Delphinidin-rhamnetin-hexoside
- Kaempferol-malonyl-hexoside
- Cyanidin-hexosil-pentoside
- Kaempferol-hexoside
- Malvidin-hexoside 1
- Quercetin-hexoside
- Epicatechin
- Petunidin-hexoside 1
- Petunidin-hexoside 2
- Myricetin-dihexosil-rhamnoside
- Quercetin acetyl-hexoside 1
- Cynarine 3
- Delphinidin-hexoside 1
- Malvidin-arabinoside
- Rhamnetil-glucuronide
- Pelargonidin-sambubioside
- Cyanidin-pentoside
- Kaempferol-rhamnosil-dihexoside
- Ellagic acid acetyl-xyloside
- Quercetin-rhamnetil-hexoside

### Blueberries Cv. Misty

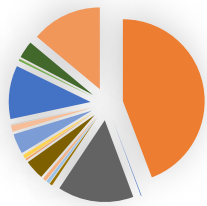

- Ferulic acid hexoside 1
- Catechin dimer
- Quercetin
- Cyanidin-hexoside (Chrysanthemine)
- Chlorogenic acid 2
- Ferulic acid hexoside 2
- Cyanidin-rhamnetin-dihexoside
- Quercetin-arabinoside
- Naringenin-hexoside
- Petunidin-pentoside
- Kaempferol-glucuronide 2
- Rhamnetil-malonyl-hexoside
- Delphinidin-hexoside 2
- Delphinidin-pentoside
- Quercetin-glucuronide
- Quercetin-xylosil-rhamnosil-hexoside
- Malvidin-hexoside 2
- Myricetin-hexoside
- Cynarine 2
- Quercetin acetyl-hexoside 2
- Kaempferol-rhamnetil-hexoside
- Quercetin-malonyl-hexoside
- Catechin dimer
- Chlorogenic acid 1
- Cyanidin-sambubiosil-rhamnetil 2
- Caffeoyl-hexose 1
- Kaempferol-rhamnoside
- Quercetin-galloyl-hexoside
- Rhamnetil-rhamnoside
- Rhamnetin-hexosil-rhamnoside
- Kaempferol-dihexoside
- Coumaric acid hexoside 2
- Caffeoyl-hexose 2
- Catechin
- Coumaric acid hexoside 1
- Kaempferol-dirhamnetil-hexoside
- Malvidin-acetylhexoside
- Delphinidin-rhamnetin-hexoside
- Kaempferol-malonyl-hexoside
- Cyanidin-hexosil-pentoside
- Kaempferol-hexoside
- Malvidin-hexoside 1
- Quercetin-hexoside
- Epicatechin
- Petunidin-hexoside 1
- Petunidin-hexoside 2
- Myricetin-dihexosil-rhamnoside
- Quercetin acetyl-hexoside 1
- Cynarine 3
- Delphinidin-hexoside 1
- Malvidin-arabinoside
- Rhamnetil-glucuronide
- Pelargonidin-sambubioside
- Cyanidin-pentoside
- Kaempferol-rhamnosil-dihexoside
- Ellagic acid acetyl-xyloside
- Quercetin-rhamnetil-hexoside
- Quercetin-dihexoside
- Myricetin-hexosil-rhamnoside
- Cynarine 1

### Goji

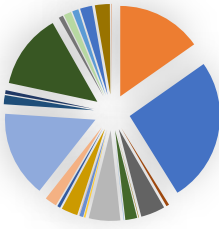

- Ferulic acid hexoside 1
- Catechin dimer
- Quercetin
- Cyanidin-hexoside (Chrysanthemine)
- Chlorogenic acid 2
- Ferulic acid hexoside 2
- Cyanidin-rhamnetin-dihexoside
- Quercetin-arabinoside
- Naringenin-hexoside
- Petunidin-pentoside
- Kaempferol-glucuronide 2
- Rhamnetil-malonyl-hexoside
- Delphinidin-hexoside 2
- Delphinidin-pentoside
- Quercetin-glucuronide
- Quercetin-xylosil-rhamnosil-hexoside
- Malvidin-hexoside 2
- Myricetin-hexoside
- Cynarine 2
- Quercetin acetyl-hexoside 2
- Kaempferol-rhamnetil-hexoside
- Quercetin-malonyl-hexoside
- Catechin dimer
- Chlorogenic acid 1
- Cyanidin-sambubiosil-rhamnetil 2
- Caffeoyl-hexose 1
- Kaempferol-rhamnoside
- Quercetin-galloyl-hexoside
- Kaempferol-dihexoside
- Coumaric acid hexoside 2
- Caffeoyl-hexose 2
- Catechin
- Coumaric acid hexoside 1
- Kaempferol-dirhamnetil-hexoside
- Malvidin-acetylhexoside
- Delphinidin-rhamnetin-hexoside
- Kaempferol-malonyl-hexoside
- Cyanidin-hexosil-pentoside
- Kaempferol-hexoside
- Malvidin-hexoside 1
- Quercetin-hexoside
- Epicatechin
- Petunidin-hexoside 1
- Petunidin-hexoside 2
- Myricetin-dihexosil-rhamnoside
- Quercetin acetyl-hexoside 1
- Cynarine 3
- Delphinidin-hexoside 1
- Malvidin-arabinoside
- Rhamnetil-glucuronide
- Pelargonidin-sambubioside
- Cyanidin-pentoside
- Kaempferol-rhamnosil-dihexoside
- Ellagic acid acetyl-xyloside
- Quercetin-rhamnetil-hexoside
- Quercetin-dihexoside

## Raspberries

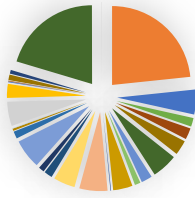

- Ferulic acid hexoside 1
- Catechin dimer
- Quercetin
- Cyanidin-hexoside (Chrysanthemine)
- Chlorogenic acid 2
- Ferulic acid hexoside 2
- Cyanidin-rhamnetin-dihexoside
- Quercetin-arabinoside
- Naringenin-hexoside
- Petunidin-pentoside
- Kaempferol-glucuronide 2
- Rhamnetil-malonyl-hexoside
- Delphinidin-hexoside 2
- Delphinidin-pentoside
- Quercetin-glucuronide
- Quercetin-xylosil-rhamnosil-hexoside
- Malvidin-hexoside 2
- Myricetin-hexoside
- Cynarine 2
- Quercetin acetyl-hexoside 2
- Kaempferol-rhamnetil-hexoside
- Quercetin-malonyl-hexoside
- Catechin dimer
- Chlorogenic acid 1
- Cyanidin-sambubiosil-rhamnetil 2
- Caffeoyl-hexose 1
- Kaempferol-rhamnoside
- Kaempferol-dihexoside
- Coumaric acid hexoside 2
- Caffeoyl-hexose 2
- Catechin
- Coumaric acid hexoside 1
- Kaempferol-dirhamnetil-hexoside
- Malvidin-acetylhexoside
- Delphinidin-rhamnetin-hexoside
- Kaempferol-malonyl-hexoside
- Cyanidin-hexosil-pentoside
- Kaempferol-hexoside
- Malvidin-hexoside 1
- Quercetin-hexoside
- Epicatechin
- Petunidin-hexoside 1
- Petunidin-hexoside 2
- Myricetin-dihexosil-rhamnoside
- Quercetin acetyl-hexoside 1
- Cynarine 3
- Delphinidin-hexoside 1
- Malvidin-arabinoside
- Rhamnetil-glucuronide
- Pelargonidin-sambubioside
- Cyanidin-pentoside
- Kaempferol-rhamnosil-dihexoside
- Ellagic acid acetyl-xyloside
- Quercetin-rhamnetil-hexoside

## Red currants

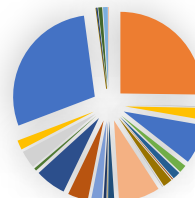

- Ferulic acid hexoside 1
- Catechin dimer
- Quercetin
- Cyanidin-hexoside (Chrysanthemine)
- Chlorogenic acid 2
- Ferulic acid hexoside 2
- Cyanidin-rhamnetin-dihexoside
- Quercetin-arabinoside
- Naringenin-hexoside
- Petunidin-pentoside
- Kaempferol-glucuronide 2
- Rhamnetil-malonyl-hexoside
- Delphinidin-hexoside 2
- Delphinidin-pentoside
- Quercetin-glucuronide
- Quercetin-xylosil-rhamnosil-hexoside
- Malvidin-hexoside 2
- Myricetin-hexoside
- Cynarine 2
- Quercetin acetyl-hexoside 2
- Kaempferol-rhamnetil-hexoside
- Quercetin-malonyl-hexoside
- Catechin dimer
- Chlorogenic acid 1
- Cyanidin-sambubiosil-rhamnetil 2
- Caffeoyl-hexose 1
- Kaempferol-rhamnoside
- Kaempferol-dihexoside
- Coumaric acid hexoside 2
- Caffeoyl-hexose 2
- Catechin
- Coumaric acid hexoside 1
- Kaempferol-dirhamnetil-hexoside
- Malvidin-acetylhexoside
- Delphinidin-rhamnetin-hexoside
- Kaempferol-malonyl-hexoside
- Cyanidin-hexosil-pentoside
- Kaempferol-hexoside
- Malvidin-hexoside 1
- Quercetin-hexoside
- Epicatechin
- Petunidin-hexoside 1
- Petunidin-hexoside 2
- Myricetin-dihexosil-rhamnoside
- Quercetin acetyl-hexoside 1
- Cynarine 3
- Delphinidin-hexoside 1
- Malvidin-arabinoside
- Rhamnetil-glucuronide
- Pelargonidin-sambubioside
- Cyanidin-pentoside
- Kaempferol-rhamnosil-dihexoside
- Ellagic acid acetyl-xyloside

## Red gooseberries

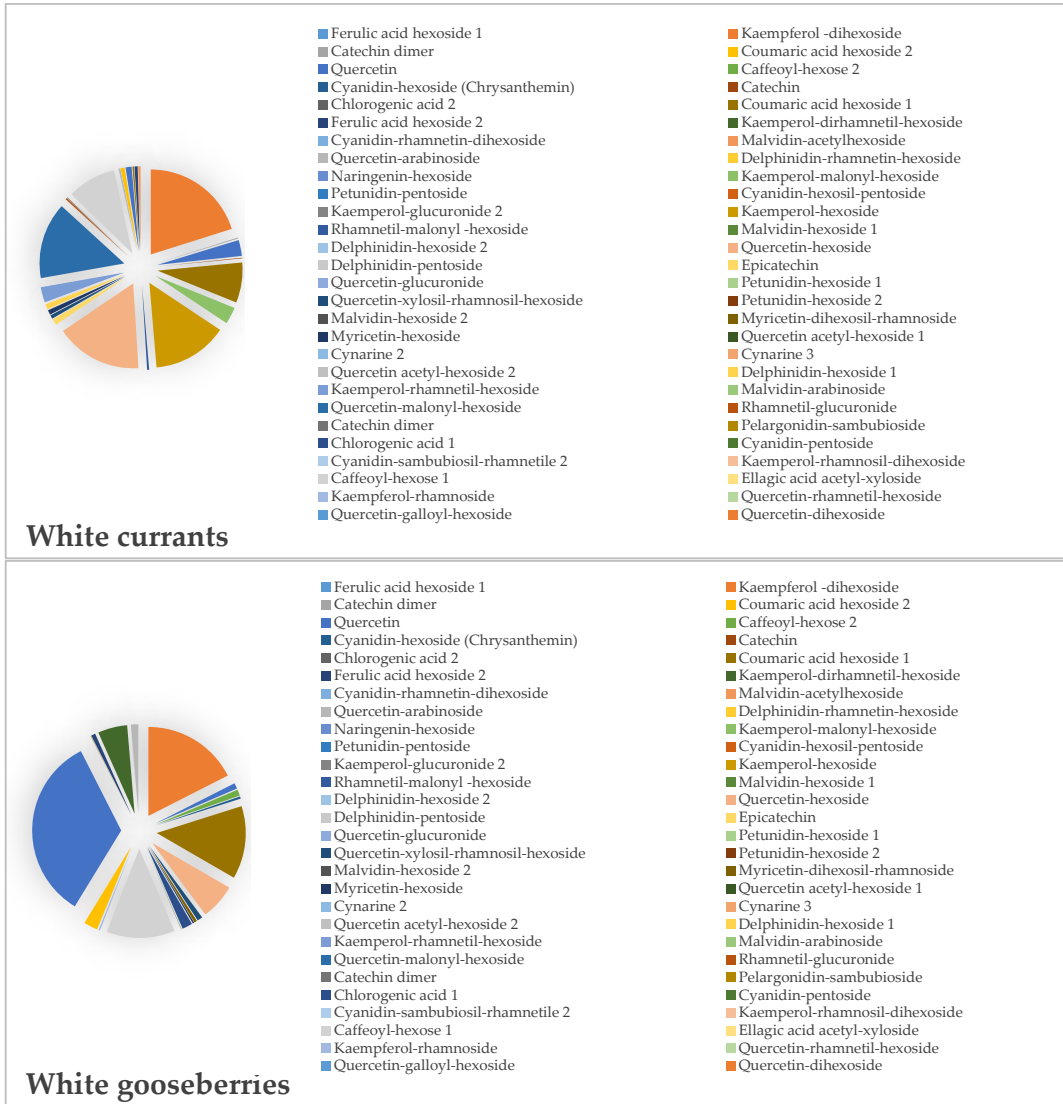

**Figure S1.** Pie charts of the 11 berry fruits representing the percentage abundances of the individual polyphenols.

**Table S1.** Area (values are expressed as arbitrary units of log<sub>10</sub> of the peak area of the corresponding selection).

| Analyte                      | <i>m/z</i> | Blackberry<br>Loch Tay | Black<br>currant | Blueberry<br>Blue Ray | Blueberry<br>Duke | Blueberry<br>Misty | Goji | Raspberry | Red<br>Currant | Red<br>Gooseberry | White<br>Currant | White<br>Gooseberry |
|------------------------------|------------|------------------------|------------------|-----------------------|-------------------|--------------------|------|-----------|----------------|-------------------|------------------|---------------------|
| Kaempferol                   | 287.0555   | 7.24                   | 7.86             | 6.49                  | 7.35              | 8.05               | 6.37 | 7.81      | 7.16           | 6.05              | 6.99             | 5.71                |
| Epicatechin                  | 291.0868   | 8.26                   | 7.43             | 8.54                  | 8.09              | nd <sup>1</sup>    | nd   | nd        | 7.76           | nd                | 7.58             | nd                  |
| Catechin                     | 291.0868   | 9.55                   | 7.58             | 8.43                  | 7.79              | nd                 | nd   | 7.09      | 7.48           | 6.96              | 6.64             | nd                  |
| Quercetin                    | 303.0504   | 9.19                   | 8.98             | 8.27                  | 9.64              | 9.59               | nd   | 8.80      | 7.82           | 8.56              | 7.99             | 7.01                |
| Coumaric acid hexoside 1     | 327.1080   | nd                     | 8.24             | nd                    | nd                | nd                 | 7.49 | 6.37      | 7.60           | 7.93              | 8.40             | 8.11                |
| Coumaric acid hexoside 2     | 327.1080   | nd                     | 8.32             | nd                    | nd                | nd                 | nd   | nd        | nd             | 8.05              | nd               | nd                  |
| Coumaric acid hexoside 3     | 327.1080   | nd                     | nd               | nd                    | nd                | nd                 | nd   | nd        | nd             | nd                | nd               | nd                  |
| Coumaroyl quinic acid 1      | 339.1079   | nd                     | 9.15             | nd                    | nd                | 7.68               | nd   | nd        | nd             | 7.87              | nd               | nd                  |
| Coumaroyl quinic acid 2      | 339.1079   | nd                     | 8.46             | 7.88                  | nd                | 7.60               | 7.42 | nd        | nd             | 7.48              | 8.81             | nd                  |
| Coumaroyl quinic acid 3      | 339.1079   | nd                     | nd               | 7.63                  | nd                | 7.65               | nd   | nd        | nd             | 7.16              | 8.22             | nd                  |
| Caffeoyl acid hexoside 1     | 343.1029   | nd                     | 8.61             | 7.69                  | nd                | 7.96               | nd   | nd        | 7.81           | 8.21              | 8.48             | 8.08                |
| Caffeoyl acid hexoside 2     | 343.1029   | nd                     | nd               | 8.11                  | nd                | 8.35               | nd   | nd        | 7.36           | 7.85              | nd               | 7.04                |
| Chlorogenic acid 1           | 355.1030   | 8.90                   | nd               | nd                    | nd                | nd                 | nd   | nd        | nd             | 8.45              | nd               | 7.26                |
| Chlorogenic acid 2           | 355.1030   | nd                     | 9.07             | 10.32                 | 10.24             | 10.31              | 8.91 | 8.02      | nd             | nd                | nd               | nd                  |
| Kaempferol-rhamnoside        | 433.1135   | nd                     | nd               | nd                    | nd                | 7.67               | nd   | nd        | nd             | nd                | 6.63             | 6.40                |
| Apigenin-hexoside            | 433.1135   | nd                     | nd               | nd                    | nd                | nd                 | nd   | nd        | nd             | nd                | 6.74             | nd                  |
| Quercetin-pentoside          | 435.0927   | 7.97                   | nd               | 8.82                  | 9.27              | 9.39               | nd   | 8.13      | nd             | 6.82              | nd               | nd                  |
| Naringenin-hexoside          | 435.1291   | 7.47                   | 8.44             | 7.78                  | 7.80              | nd                 | nd   | 7.22      | 7.47           | nd                | nd               | nd                  |
| Kaempferol-hexoside          | 449.1082   | nd                     | 9.02             | nd                    | nd                | nd                 | nd   | 7.85      | 7.72           | nd                | 8.67             | nd                  |
| Quercetin-rhamnoside         | 449.1135   | nd                     | nd               | nd                    | nd                | 9.27               | nd   | nd        | nd             | nd                | nd               | nd                  |
| Kaempferol-glucuronide 1     | 463.1032   | 7.79                   | nd               | nd                    | nd                | nd                 | nd   | nd        | nd             | nd                | nd               | nd                  |
| Kaempferol-glucuronide 2     | 463.1032   | 8.09                   | nd               | nd                    | nd                | nd                 | nd   | nd        | nd             | nd                | nd               | nd                  |
| Rhamnetin-rhamnoside         | 463.1239   | nd                     | nd               | nd                    | nd                | nd                 | 6.56 | nd        | nd             | nd                | 6.66             | nd                  |
| Quercetin-hexoside           | 465.1031   | 9.41                   | 9.40             | 9.40                  | 9.56              | 9.87               | 7.58 | 7.72      | 7.87           | 8.57              | 8.73             | 7.80                |
| Ellagic acid-acetyl-xyloside | 477.0829   | 7.73                   | nd               | nd                    | nd                | nd                 | nd   | nd        | nd             | nd                | nd               | nd                  |
| Quercetin-glucuronide        | 479.0825   | 9.43                   | nd               | nd                    | 8.69              | nd                 | nd   | 8.57      | nd             | nd                | nd               | nd                  |
| Rhamnetin-hexoside           | 479.1186   | nd                     | nd               | 8.80                  | nd                | 8.11               | nd   | nd        | nd             | 8.26              | 7.04             | nd                  |
| Myricetin-hexoside           | 481.098    | nd                     | 9.61             | 8.50                  | 8.27              | 8.77               | nd   | 7.20      | 7.18           | 7.43              | 7.46             | 6.39                |
| Quercetin acetylhexoside 1   | 507.1301   | nd                     | nd               | 8.83                  | nd                | 9.43               | nd   | 8.51      | nd             | nd                | nd               | nd                  |
| Quercetin acetylhexoside 2   | 507.1301   | 7.81                   | nd               | 8.64                  | 8.88              | 9.04               | nd   | nd        | nd             | nd                | nd               | nd                  |
| Cynarin 1                    | 517.1345   | nd                     | nd               | 8.30                  | 8.10              | 7.82               | 7.33 | nd        | nd             | nd                | nd               | nd                  |
| Cynarin 2                    | 517.1345   | nd                     | nd               | nd                    | nd                | 8.19               | nd   | nd        | nd             | nd                | nd               | nd                  |
| Cynarin 3                    | 517.1345   | nd                     | nd               | nd                    | nd                | nd                 | 7.28 | nd        | nd             | nd                | nd               | nd                  |
| Kaempferol-malonyl-hexoside  | 535.1086   | 7.86                   | 8.58             | nd                    | nd                | 8.00               | nd   | nd        | 7.19           | nd                | 8.02             | nd                  |
| Quercetin-malonyl-hexoside   | 551.1038   | 9.22                   | 8.88             | 8.36                  | 8.87              | 8.97               | nd   | nd        | 7.28           | nd                | 8.68             | nd                  |
| Rhamnetin-malonyl-hexoside   | 565.1194   | nd                     | 8.24             | 7.47                  | 8.10              | 8.10               | nd   | 7.13      | 6.24           | nd                | 7.09             | nd                  |
| Procyanidin dimer 1          | 579.1505   | 8.57                   | 8.19             | 8.10                  | 8.00              | nd                 | nd   | nd        | nd             | 6.53              | 6.78             | nd                  |

|                                         |          |      |      |      |      |      |      |      |      |      |      |      |
|-----------------------------------------|----------|------|------|------|------|------|------|------|------|------|------|------|
| Procyanidin dimer 2                     | 579.1505 | nd   | nd   | 7.95 | 8.12 | nd   | nd   | 7.29 | nd   | nd   | 6.60 | nd   |
| Kaempferol-rhamnosyl-hexoside           | 595.1665 | nd   | 9.05 | nd   | nd   | 8.06 | 8.33 | nd   | 7.89 | 8.00 | 7.97 | nd   |
| Quercetin-arabinosyl-hexoside           | 597.1663 | 7.07 | nd   | nd   | nd   | nd   | nd   | nd   | 7.01 | 7.11 | 7.29 | 6.88 |
| Quercetin-arabinosyl-glucuronide        | 611.1459 | nd   | nd   | nd   | nd   | nd   | nd   | nd   | nd   | nd   | nd   | nd   |
| Quercetin-rhamnosyl-hexoside            | 611.1616 | 8.96 | 9.65 | 7.96 | 8.40 | 9.03 | 9.38 | nd   | 8.48 | 9.06 | 8.82 | 8.23 |
| Kaempferol-dihexoside                   | 611.1616 | nd   | nd   | nd   | nd   | nd   | nd   | 7.51 | nd   | nd   | nd   | nd   |
| Quercetin-galloyl-hexoside              | 617.1146 | nd   | nd   | nd   | nd   | nd   | nd   | 7.44 | nd   | nd   | nd   | nd   |
| Rhamnetin-rhamnosyl-hexoside            | 625.1771 | 8.11 | 8.58 | 8.17 | 8.72 | 8.85 | 8.75 | 7.72 | 6.37 | 9.12 | 7.57 | 8.52 |
| Quercetin-dihexoside                    | 627.1567 | 8.06 | nd   | nd   | 7.23 | nd   | nd   | nd   | nd   | nd   | nd   | nd   |
| Myricetin-rhamnosyl-hexoside            | 627.1567 | nd   | 9.73 | nd   | nd   | nd   | nd   | nd   | 7.57 | 7.94 | 7.40 | 7.39 |
| Quercetin-acetyl-arabinosyl-hexoside    | 639.1569 | nd   | nd   | nd   | nd   | nd   | nd   | nd   | nd   | nd   | nd   | nd   |
| Kaempferol-dirhamnosyl-hexoside         | 741.2252 | nd   | nd   | nd   | nd   | nd   | nd   | 7.71 | 7.83 | nd   | nd   | nd   |
| Quercetin-arabinosyl-rhamnosyl-hexoside | 743.2025 | 7.39 | nd   | nd   | nd   | nd   | nd   | 7.59 | 7.34 | 7.76 | 7.36 | 6.99 |
| Kaempferol-rhamnosyl-dihexoside         | 757.2202 | nd   | nd   | nd   | nd   | nd   | 7.83 | nd   | nd   | nd   | nd   | nd   |
| Quercetin-dirhamnosyl-hexoside          | 757.2202 | 7.23 | nd   | nd   | nd   | nd   | 8.26 | nd   | 8.42 | 7.56 | nd   | 7.72 |
| Quercetin-rhamnosyl-dihexoside          | 773.2153 | nd   | nd   | nd   | nd   | nd   | 8.87 | 6.19 | nd   | 6.66 | 7.16 | nd   |
| Myricetin-dirhamnosyl-hexoside          | 773.2153 | nd   | nd   | nd   | nd   | nd   | nd   | nd   | 5.53 | nd   | nd   | 7.11 |
| Rhamnetin-rhamnosyl-dihexoside          | 787.2310 | nd   | nd   | nd   | nd   | nd   | 8.32 | nd   | nd   | 6.74 | nd   | 6.70 |
| Procyanidin trimer                      | 867.2157 | nd   | nd   | 7.42 | 7.42 | nd   | nd   | 7.77 | nd   | nd   | nd   | nd   |
| Cyanidin hexoside                       | 449.1084 | 9.21 | 8.14 | nd   | nd   | nd   | nd   | nd   | nd   | 7.83 | nd   | nd   |
| Cyanidin-rhamnosyl-hexoside             | 581.1708 | 8.21 | 9.10 | nd   | nd   | nd   | nd   | nd   | nd   | 7.62 | nd   | nd   |
| Cyanidin pentoside                      | 419.1134 | 7.96 | nd   | nd   | nd   | nd   | nd   | nd   | nd   | nd   | nd   | nd   |
| Cyanidin-rhamnosyl-dihexoside           | 757.2456 | nd   | nd   | nd   | nd   | nd   | nd   | 6.32 | nd   | nd   | nd   | nd   |
| Delphinidin-hexoside 1                  | 465.1032 | nd   | nd   | 7.91 | 7.80 | 8.51 | nd   | nd   | nd   | nd   | nd   | nd   |
| Delphinidin-hexoside 2                  | 465.1032 | nd   | 8.66 | 7.69 | 7.80 | 8.17 | nd   | nd   | nd   | nd   | nd   | nd   |
| Delphinidin-pentoside                   | 435.0927 | nd   | nd   | 8.14 | 7.85 | 8.42 | nd   | nd   | nd   | nd   | nd   | nd   |
| Petunidin-hexoside 1                    | 479.1188 | nd   | nd   | 8.42 | 8.15 | 8.62 | nd   | nd   | nd   | nd   | nd   | nd   |

|                                   |          |    |      |      |      |      |    |    |      |    |    |    |
|-----------------------------------|----------|----|------|------|------|------|----|----|------|----|----|----|
| Petunidin-hexoside 2              | 479.1188 | nd | nd   | 8.27 | nd   | 8.42 | nd | nd | nd   | nd | nd | nd |
| Petunidin-pentoside               | 449.1082 | nd | nd   | 8.57 | 8.30 | 8.49 | nd | nd | nd   | nd | nd | nd |
| Malvidin-hexoside 1               | 493.1343 | nd | nd   | 9.67 | 9.13 | 9.20 | nd | nd | nd   | nd | nd | nd |
| Malvidin-hexoside 2               | 493.1343 | nd | nd   | nd   | nd   | 8.90 | nd | nd | nd   | nd | nd | nd |
| Malvidin-pentoside                | 463.1239 | nd | nd   | 9.46 | 9.19 | 9.19 | nd | nd | nd   | nd | nd | nd |
| Malvidin-acetyl-hexoside          | 535.1452 | nd | nd   | 8.46 | nd   | 8.32 | nd | nd | nd   | nd | nd | nd |
| Delphinidin-rhamnosyl-hexoside    | 611.1615 | nd | 9.26 | nd   | nd   | nd   | nd | nd | nd   | nd | nd | nd |
| Cyanidin-sambubiosyl-rhamnoside 1 | 727.2350 | nd | nd   | nd   | nd   | nd   | nd | nd | 6.24 | nd | nd | nd |
| Cyanidin-sambubiosyl-rhamnoside 2 | 727.2350 | nd | nd   | nd   | nd   | nd   | nd | nd | 5.98 | nd | nd | nd |

<sup>1</sup> nd = not detected.

**Table 2.** Polyphenolic compounds identification by HPLC-HRMS in positive polarity.



| Analyte                            | [M+H] <sup>+</sup> | Occurrence in Samples                  | MSMS Fragments               | Identification by   |
|------------------------------------|--------------------|----------------------------------------|------------------------------|---------------------|
| Kaempferol                         | 287.0555           | All the samples                        | 137.0232, 269.2270           | Standard            |
| Epicatechin                        | 291.0868           | BB, BC, DB, LB, RC, WC <sup>1</sup>    | 139.0388, 273.0764           | Standard            |
| Catechin                           | 291.0868           | BC, BB, DB, LB, RA, RC, RG, WC         | 139.0388, 273.0765           | Standard            |
| Quercetin                          | 303.0604           | All the samples                        | 257.0450, 285.0401           | Standard            |
| Coumaric acid hexoside 1           | 327.0868           | BC, GO, RA, RC, RG, WC, WG             | 295.0607, 165.0547           | Reference [9,31,42] |
| Coumaric acid hexoside 2           | 327.0868           | BC, RG                                 | 295.0607, 165.0547           | Reference [9,31,42] |
| Caffeoyl-hexoside 1                | 343.1029           | BB, BC, MB, RC, RG, WC, WG             | 325.0714, 191.0342, 181.0861 | Reference [31]      |
| Caffeoyl-hexoside 2                | 343.1029           | BB, MB, RC, RG, WG                     | 325.0714, 191.0342, 181.0861 | Reference [31]      |
| Chlorogenic acid 1                 | 355.1030           | LB, RG, WG,                            | 163.039                      | Reference [26]      |
| Chlorogenic acid 2                 | 355.1030           | BB, BC, DB, GO, MB, RA                 | 163.039                      | Reference [26]      |
| Ferulic acid hexoside 1            | 357.1187           | BB, MB                                 | 163.0391, 195.0655           | MS/Reference [43]   |
| Ferulic acid hexoside 2            | 357.1187           | BB, MB                                 | 163.0391, 195.0655           | MS                  |
| Cyanidin-pentoside                 | 419.1134           | LB, RG, WG                             | 287.0556                     | Reference [9]       |
| Kaempferol-rhamnoside              | 433.1135           | MB, WC, WG                             | 287.0556                     | MS                  |
| Delphinidin-pentoside              | 435.0927           | BB, DB, MB                             | 303.0505                     | Reference [9]       |
| Quercetin-arabinoside              | 435.0927           | BB, DB, LB, MB, RA, RG                 | 303.0608                     | Reference [31]      |
| Naringenin-hexoside                | 435.1291           | BB, BC, LB, RA, RC                     | 273.0971                     | MS                  |
| Kaempferol-hexoside                | 449.0880           | BC, RA, RC, WC                         | 287.0557                     | Reference [31]      |
| Petunidin-pentoside                | 449.1082           | BB, DB, MB                             | 317.0661                     | Reference [9,44]    |
| Cyanidin-hexoside (Chrysanthemine) | 449.1084           | BC, LB, RG, WG                         | 287.0555                     | Reference [9]       |
| Kaempferol-glucuronide 1           | 463.1032           | LB                                     | 287.065                      | MS                  |
| Kaempferol-glucuronide 2           | 463.1032           | LB                                     | 287.065                      | MS                  |
| Malvidin-arabinoside               | 463.1239           | BB, DB, MB                             | 331.0818                     | Reference [9]       |
| Rhamnetin-rhamnoside               | 463.1239           | GO, WC                                 | 317.2076                     | MS                  |
| Quercetin-hexoside                 | 465.1031           | All the samples                        | 303.0608                     | Reference [31,45]   |
| Delphinidin-hexoside 1             | 465.1032           | BB, DB, GO, MB, WC                     | 303.0506                     | Reference [9]       |
| Delphinidin-hexoside 2             | 465.1032           | BB, BC, DB, GO, MB                     | 303.0506                     | Reference [9]       |
| Ellagic acid acetyl-xyloside       | 477.0829           | LB                                     | 301.0461, 179.0054           | MS                  |
| Quercetin-glucuronide              | 479.0825           | LB                                     | 303.0608                     | Reference [31,44]   |
| Rhamnetin-glucuronide              | 479.1186           | BB, MB, RG, WC                         | 317.2076                     | Reference [31,44]   |
| Petunidin-hexoside 1               | 479.1188           | BB, DB, MB                             | 317.0662                     | Reference [26]      |
| Petunidin-hexoside 2               | 479.1188           | BB, MB                                 | 317.0662                     | Reference [26]      |
| Myricetin-hexoside                 | 481.0980           | BB, BC, DB, LB, MB, RA, RC, RG, WC, WG | 319.0572                     | Reference [31]      |
| Malvidin-hexoside 1                | 493.1343           | BB, DB, MB                             | 331.0818                     | MS                  |
| Malvidin-hexoside 2                | 493.1343           | MB                                     | 331.0818                     | MS                  |
| Quercetin-acetyl-hexoside 1        | 507.1303           | BB, MB, RA                             | 303.0505                     | Reference [46]      |
| Quercetin-acetyl-hexoside 2        | 507.1303           | BB, DB, LB, MB                         | 303.0506                     | Reference [46]      |
| Cynarine 1                         | 517.1345           | BB, DB, GO, MB                         | 499.1238                     | MS                  |
| Cynarine 2                         | 517.1345           | MB                                     | 499.1238                     | MS                  |
| Cynarine 3                         | 517.1345           | GO                                     | 499.1238                     | MS                  |
| Kaempferol-malonyl-hexoside        | 535.1086           | BC, LB, MB, RC, WC                     | 287.0650, 491.1348           | MS                  |
| Malvidin-acetyl-hexoside           | 535.1452           | BB, MB                                 | 331.082                      | Reference [26]      |
| Quercetin-malonyl-hexoside         | 551.1220           | BB, BC, DB, LB, MB, RC, WC             | 303.0607                     | Reference [31]      |
| Rhamnetin-malonyl-hexoside         | 565.1194           | BB, BC, DB, LB, MB, RC, WC             | 317.2075                     | MS                  |
| Pelargonidin-sambubioside          | 565.176            | RC                                     | 271.243                      | MS                  |
| Procyanidin dimer                  | 579.1505           | BB, BC, DB, LB, RG, WC                 | 291.087, 427.1169            | MS                  |
| Procyanidin dimer                  | 579.1505           | BB, DB, RA, WC                         | 291.087, 427.1169            | MS                  |
| Cyanidin-hexosyl-pentoside         | 581.1708           | BC, RA                                 | 449.0394, 419.1182           | MS                  |
| Cyanidin-rutinoside                | 595.1664           | BC, LB, RA, RG,                        | 287.0556                     | MS                  |
| Kaempferol-rhamnetin-hexoside      | 595.1665           | GO, MB, RG, WC                         | 287.0650, 449.1230           | MS                  |

|                                      |          |                        |                                           |                   |
|--------------------------------------|----------|------------------------|-------------------------------------------|-------------------|
| Quercetin-xilosil-hexoside           | 597.1663 | LB, RC, RG, WC, WG     | 303.0605, 465.0927,<br>435.1341           | MS                |
| Delphinidin-rhamnetin-hexoside       | 611.1514 | BC, RA                 | 303.0554, 465.1079                        | MS                |
| Kaempferol-dihexoside                | 611.1616 | All the samples        | 287.0652, 449.123                         | Reference [47]    |
| Quercetin-rhamnetin-hexoside         | 611.1616 | BB, DB, RA, MB         | 303.0608, 465.1187                        | MS/Reference [44] |
| Quercetin-galloyl-hexoside           | 617.1146 | RA                     | 303.0605, 465.1028                        | MS                |
| Rhamnetin-hexosyl-rhamnoside         | 625.1771 | All the samples        | 317.0663, 479.1186                        | Reference [31]    |
| Quercetin-dihexoside                 | 627.1567 | DB, LB                 | 303.0605                                  | Reference [31]    |
| Myricetin-hexosyl-rhamnoside         | 627.1567 | BC, RC, RG, WC, WG     | 319.0570, 465.103                         | MS                |
| Syringetin-rutinoside 1              | 655.2036 | MB                     | 357.0975, 623.1766,<br>389.1237           | Reference [31,48] |
| Syringetin-rutinoside 2              | 655.2036 | MB                     | 357.0975, 623.1766,<br>389.1237           | Reference [31,48] |
| Cyanidin-sambubiosyl-rhamnetin 1     | 727.2350 | BC, RC                 | 287.0555, 433.3021                        | MS                |
| Cyanidin-sambubiosyl-rhamnetin 2     | 727.2350 | BC, RC                 | 287.0555, 433.3020                        | MS                |
| Kaempferol-dirhamnetil-hexoside      | 741.2253 | RA, RC                 | 287.0557, 595.1662,<br>449.1082           | MS                |
| Quercetin-xilosil-rhamnosyl-hexoside | 743.2025 | LB, RA, RC, RG, WC, WG | 303.0506, 611.1613,<br>465.1031           | MS                |
| Kaempferol-rhamnosyl-dihexoside      | 757.2202 | GO                     | 449.1080, 595.1661,<br>287.0556           | MS                |
| Quercetin-dirhamnosyl-hexoside       | 757.2202 | GO, LB, RC, RG, WG     | 611.1614, 303.0506                        | Reference [31]    |
| Cyanidin-rhamnetin-dihexoside        | 757.2456 | RA                     | 595.1930, 433.1404,<br>287.0556           | MS                |
| Quercetin-rhamnosyl-dihexoside       | 773.2153 | GO, RA, RG, WC         | 465.1030, 627.1561,<br>611.1612, 303.0506 | Reference [31]    |
| Myricetin-hexosyl-dirhamnoside       | 773.2153 | RC, WG                 | 319.0455, 627.1563                        | MS                |
| Myricetin-dihexosyl-rhamnoside       | 787.2310 | GO, RG, WG             | 479.1186, 641.1716,<br>317.0662           | MS                |

<sup>1</sup>BB = Blueberries *Cv.* Blue Ray, BC = Black Currant, DB = Blueberries *Cv.* Duke, GO = Goij, LB = Blackberry *Cv.* Loch Tay, MB = Blueberries *Cv.* Misty, MS = Mass Spectrometry, RA = Raspberries, RC = Red Currant, RG = Red Gooseberry, WC = White Currant, WG = White gooseberry.

## REFERENCE

- 42 Skrovankova, S.; Sumczynski, D.; Mlcek, J.; Jurikova, T.; Sochor, J. Bioactive compounds and antioxidant activity in different types of berries. *Int. J. Mol. Sci.* **2015**, *16*, 24673–24706, doi:0.3390/ijms161024673.
- 43 Ieri, F.; Innocenti, M.; Possieri, L.; Gallori, S.; Mulinacci, N. Phenolic composition of “bud extracts” of *Ribes nigrum* L., *Rosa canina* L. and *Tilia tomentosa* M. *J. Pharm. Biomed. Anal.* **2015**, *115*, 1–9, doi:10.1016/j.jpba.2015.06.004.
- 44 Ancillotti, C.; Ciofi, L.; Pucci, D.; Sagona, E.; Giordani, E.; Bircolli, S.; Gori, M.; Petrucci, W.A.; Giardi, F.; Bartoletti R.; et al. Polyphenolic profiles and antioxidant and antiradical activity of Italian berries from *Vaccinium myrtillus* L. and *Vaccinium uliginosum* L. subsp. *gaultherioides* (Bigelow) S.B. Young. *Food Chem.* **2016**, *204*, 176–184, doi:10.1016/j.foodchem.2016.02.106.
- 45 Liu, P.; Kallio, H.; Yang, B. Phenolic compounds in hawthorn (*Crataegus grayana*) fruits and leaves and changes during fruit ripening. *J. Agric. Food Chem.* **2011**, *59*, 11141–11149, doi:10.1021/jf202465u.
- 46 Jang, G.H.; Kim, H.W.; Lee, M.K.; Jeong, S.Y.; Bak, A.R.; Lee, D.J.; Kim, J.B. Characterization and quantification of flavonoid glycosides in the *Prunus* genus by UPLC-DAD-QTOF/MS. *Saudi J. Biol. Sci.* **2018**, *25*, 1622–1631, doi:10.1016/j.sjbs.2016.08.001.
- 47 Lavola, A.; Karjalainen, R.; Julkunen-Tiitto, R. Bioactive polyphenols in leaves, stems, and berries of Saskatoon (*Amelanchier alnifolia* Nutt.) cultivars. *J. Agric. Food Chem.* **2012**, *60*, 1020–1027, doi:10.1021/jf204056s.
- 48 Fang, R.; Veitch, N.C.; Kite, G.C.; Porter, E.A.; Simmonds, M.S.J. Enhanced profiling of flavonol glycosides in the fruits of sea buckthorn (*Hippophae rhamnoides*). *J. Agric. Food Chem.* **2013**, *61*, 3868–3875, doi:10.1021/jf304604v.
